# Supplementary material for: Three-dimensionally-architectured GaN light emitting crystals
Source: Royal Society of Chemistry journal article supplement (doi:10.1039/c7ce00057j), 2017-01-01
Supplement: c7ce00057j1.pdf [file c7ce00057j1.pdf]

**ELECTRONIC SUPPLEMENTARY INFORMATION**

# Three-dimensionally-architected GaN light emitting crystals

Dong Won Yang<sup>a</sup>, Dongha Yoo<sup>b</sup>, Won Woo Lee<sup>a</sup>, Jung Min Lee<sup>a</sup>, Gyu-Chul Yi<sup>b</sup> and Won Il Park<sup>\*a</sup>

<sup>a</sup>Division of Materials Science and Engineering, Hanyang University, Seoul 04763, Republic of Korea. E-mail: wipark@hanyang.ac.kr; Tel: +82 02 2220 0504.

<sup>b</sup>Department of Physics and Astronomy, Seoul National University, Seoul 08826, Republic of Korea.

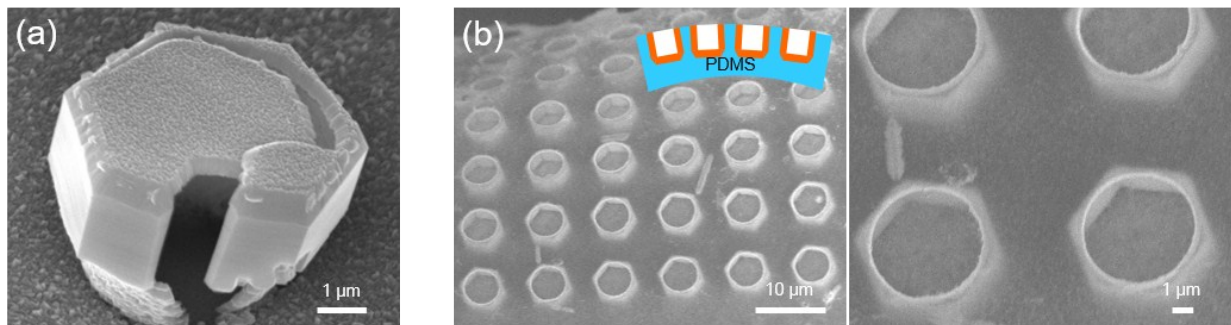

**Figure S1.** (a) SEM image of broken GaN crystal. (b) SEM images of GaN crystal array embedded in PDMS and mechanically exploited from the substrate.

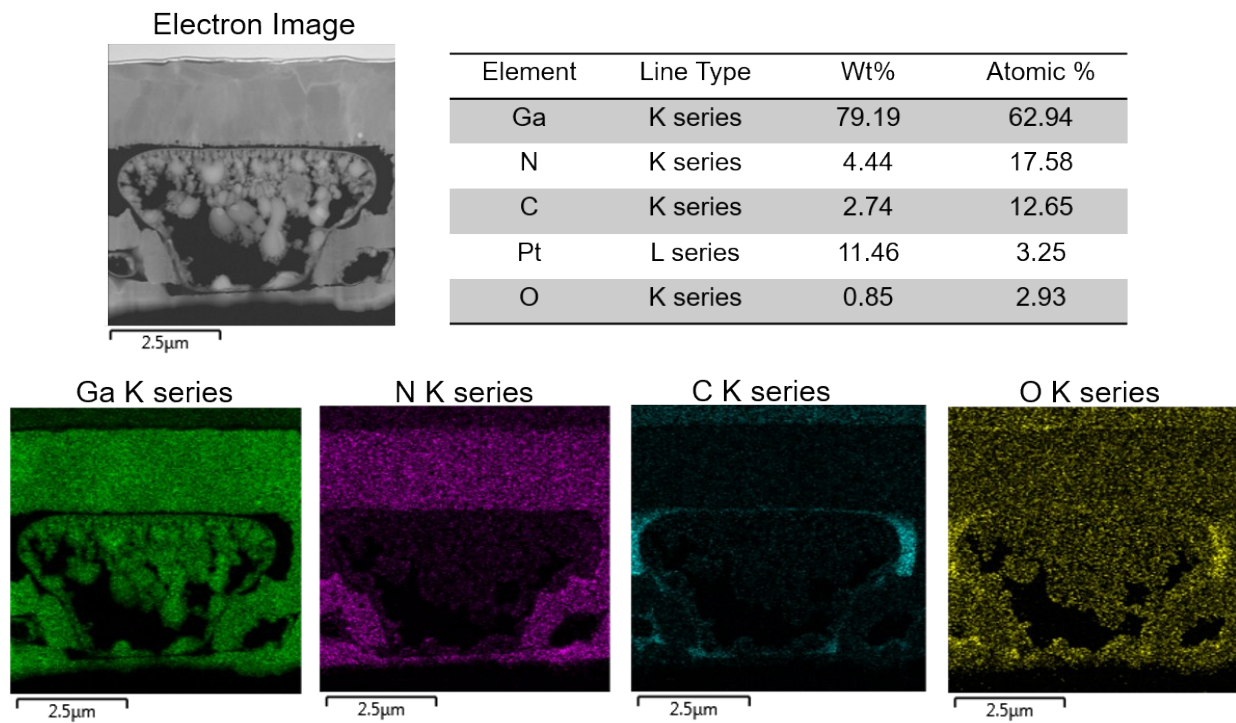

**Figure S2.** Top: TEM image (left panel) and corresponding EDS analysis result (right panel). Bottom: The corresponding elemental mapping images of Ga (green), N (purple), C (blue) and O (yellow).

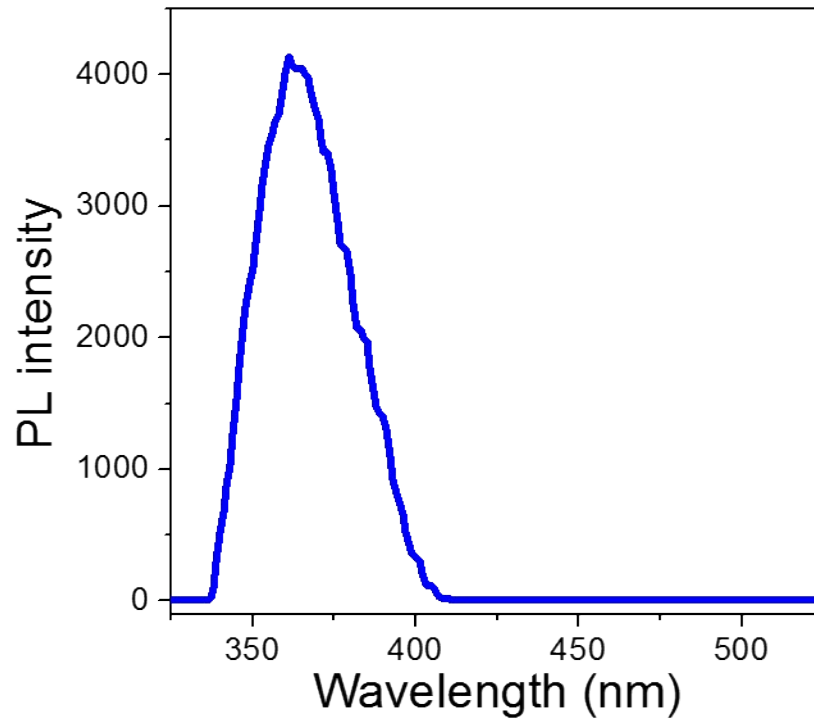

**Figure S3.** Room temperature PL spectrum of n-type GaN crystals.
