# Supplementary material for: Three-dimensionally-architectured GaN light emitting crystals
Source: Royal Society of Chemistry journal article supplement (doi:10.1039/c7ce00057j), 2017-01-01

### Electron Image

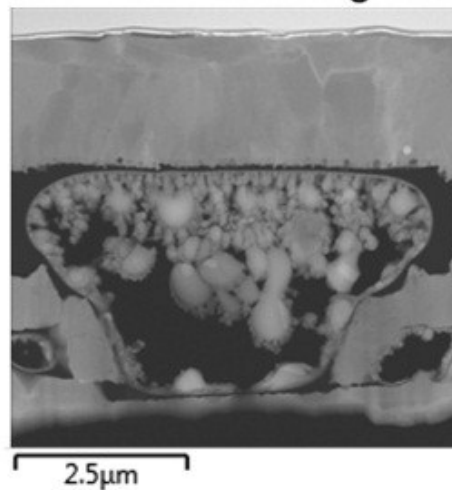

| Element | Line Type | Wt%   | Atomic % |
|---------|-----------|-------|----------|
| Ga      | K series  | 79.19 | 62.94    |
| N       | K series  | 4.44  | 17.58    |
| C       | K series  | 2.74  | 12.65    |
| Pt      | L series  | 11.46 | 3.25     |
| O       | K series  | 0.85  | 2.93     |

### Ga K series

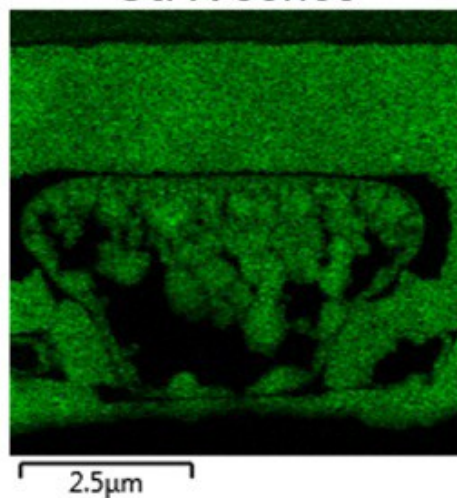

### N K series

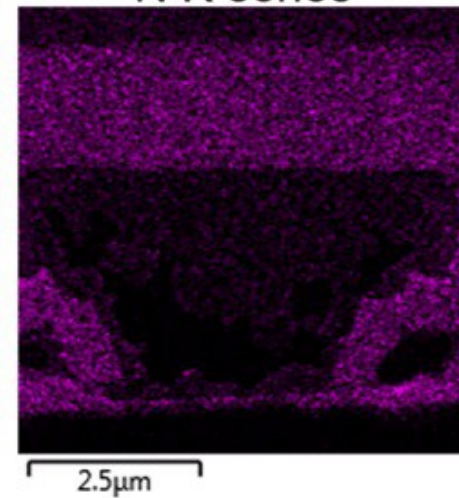

### C K series

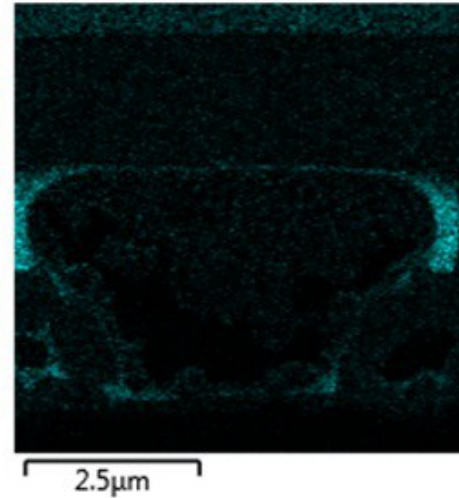

### O K series

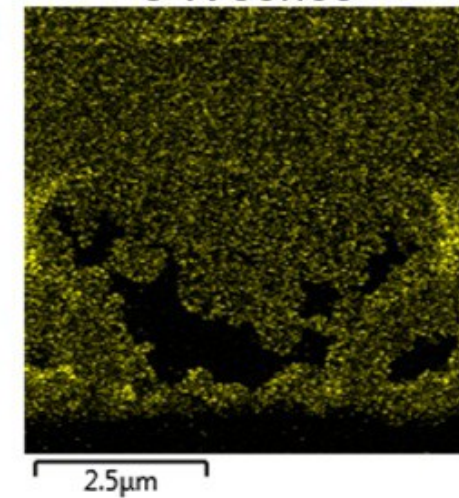

Supplement: c7ce00057j4.pdf [file c7ce00057j4.pdf]
