# Supplementary figures and images for: Three-dimensionally-architectured GaN light emitting crystals
Source: Royal Society of Chemistry journal article supplement (doi:10.1039/c7ce00057j), 2017-01-01

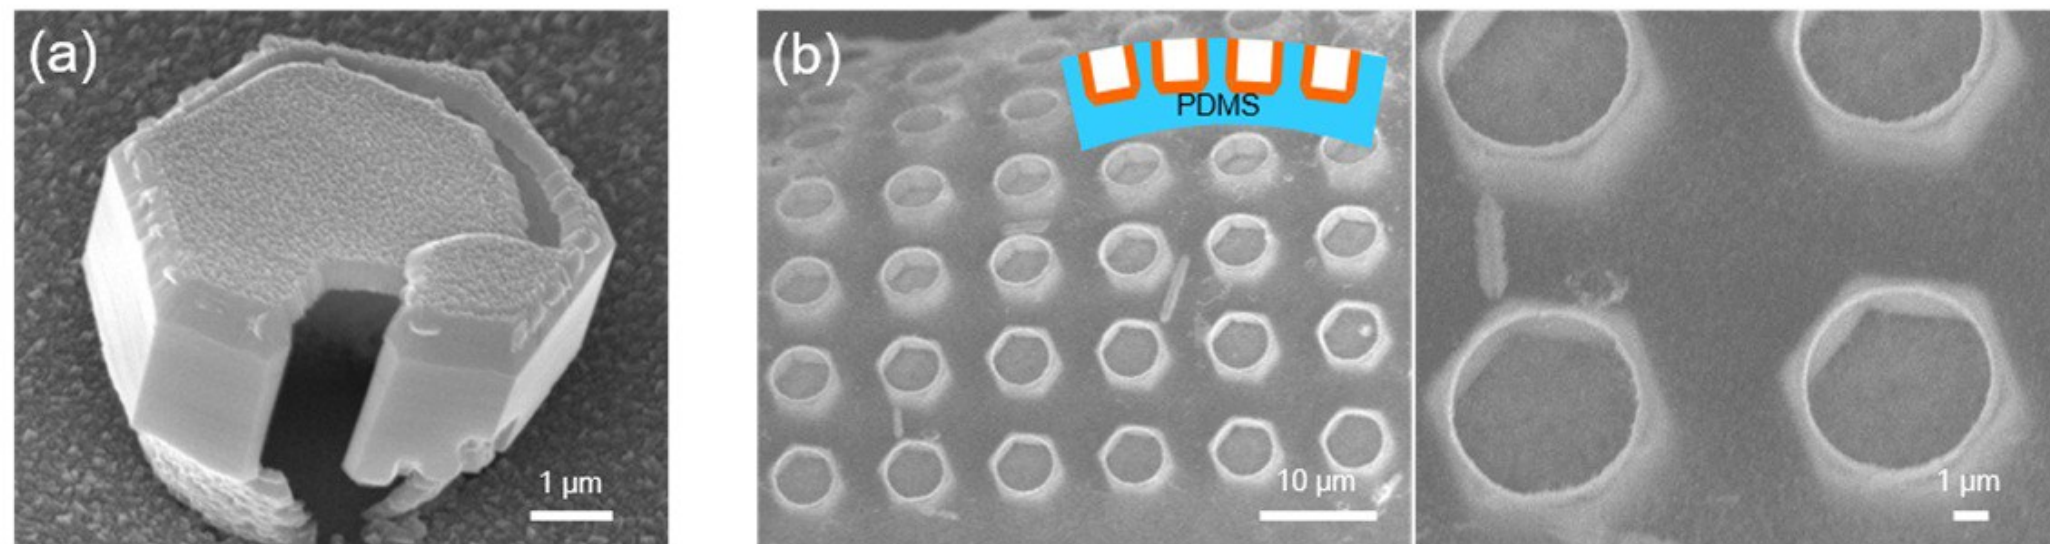

Supplement: c7ce00057j3.pdf [file c7ce00057j3.pdf]

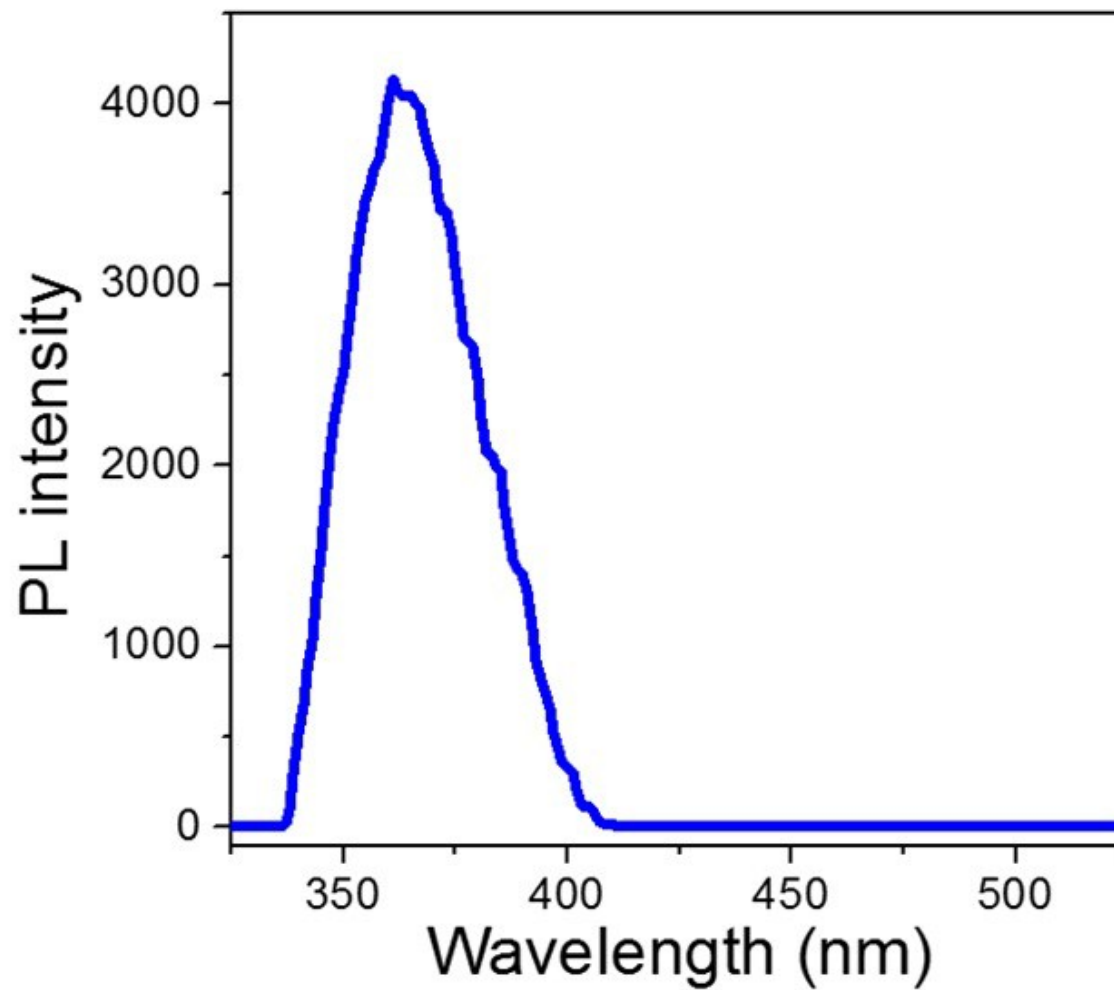

Supplement: c7ce00057j5.pdf [file c7ce00057j5.pdf]
